# Supplementary material for: Resveratrol Modulates Mitochondria Dynamics in Replicative Senescent Yeast Cells
Source: PubMed Central journal article supplement (PMC4123921; doi:10.1371/journal.pone.0104345), 2014-08-06
Supplement: pone.0104345.s001.pdf [file pone.0104345.s001.pdf]

**Figure S1. Overexpression of fission/fusion genes caused mitochondrial network morphology change in yeast cells.**

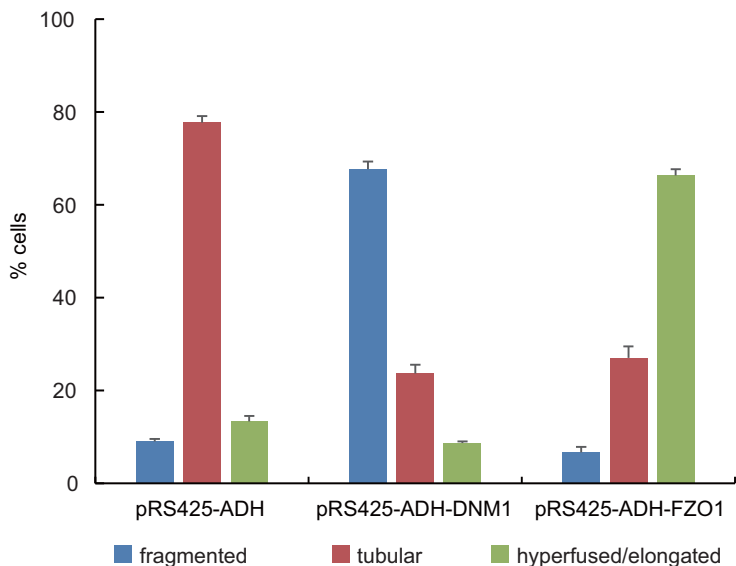

To examine the effects of overexpression of fission/fusion genes on mitochondria dynamics, *DNM1* and *FZO1* were constructed in pRS425 plasmids with ADH promoter, which constitutively drives high levels of gene expression. The pRS425-ADH-DNM1 and pRS425-ADH-FZO1 were transformed into wild type yeast cells. The morphology of mitochondrial network in these fission/fusion gene overexpressed cells were classified. We found that most cells with overexpressed *DNM1* possessed fragmented mitochondria, while majority of cells with overexpressed *FZO1* have hyperfused/elongated mitochondria.
