# Supplementary material for: Resveratrol Modulates Mitochondria Dynamics in Replicative Senescent Yeast Cells
Source: PubMed Central journal article supplement (PMC4123921; doi:10.1371/journal.pone.0104345), 2014-08-06
Supplement: pone.0104345.s002.pdf [file pone.0104345.s002.pdf]

**Table S1. The ratio of senescent cells stained by Annexin V and Propidium iodide.**

|                               | <b>80 mM acetic acid</b> | <b>Log phase</b> | <b>48 hr young</b> | <b>48 hr senescent</b> |
|-------------------------------|--------------------------|------------------|--------------------|------------------------|
| <b>Annexin V (-) ; PI (-)</b> | 48.5%±1.95%              | 75.1%±6.8%       | 94.4%±6.5%         | 94.4%±3.0%             |
| <b>Annexin V (+) ; PI (-)</b> | 37.8%±6.1%               | 20.9%±5.7%       | 6.9%±4.6%          | 5.0%±2.5%              |
| <b>Annexin V (+) ; PI (+)</b> | 11.1%±5.6%               | 20.6%±7.9%       | 0.02%±0.03%        | 0.5%±0.3%              |
| <b>Annexin V (-) ; PI (+)</b> | 17.1%±1.9%               | 6.3%±3.6%        | 0.4%±0.3%          | 0.3%±0.2%              |

Cells stained with the Annexin V-FITC and PI and were analyzed by flow cytometer.

The 80 mM acetic acid-treated cells were served as apoptotic control groups. Based on our results, young and senescent groups from 48 hour sample had no significant increase of Annexin V (+) cells. Therefore, the senescent samples in our experiments were not in apoptosis.
